# Supplementary material
Source: publisher figshare collection journal article supplement (https://sage.figshare.com/ndownloader/files/23681564)
Supplement: Supplementary file 1 [file 23681564]

## QUESTIONNAIRE ON NEIGHBORHOOD CHARACTERISTICS

The Department of Social Psychology of the University of Malaga is carrying out a study on aspects related to your neighborhood. To do so, we are carrying out interviews with randomly selected individuals. The interviews are completely anonymous. There are no right or wrong answers. We are, above all, interested in your opinion.

**We would like to thank you beforehand for your collaboration**

VERSION 1

### A. Sociodemographic data

|                                                                                                       |                                                     |                                 |                               |                               |                        |                     |               |
|-------------------------------------------------------------------------------------------------------|-----------------------------------------------------|---------------------------------|-------------------------------|-------------------------------|------------------------|---------------------|---------------|
| <b>Age:</b> .....                                                                                     | <b>Sex:</b> (1) Woman (2) Man                       |                                 |                               |                               |                        |                     |               |
| <b>Personal situation:</b> (1) With partner (2) Without partner                                       | <b>Children:</b> (1) Yes (2) No                     |                                 |                               |                               |                        |                     |               |
| <b>Currently employed:</b> (1) Yes (2) No                                                             |                                                     |                                 |                               |                               |                        |                     |               |
| If the previous answer is No:<br><b>How long have you been unemployed:</b> ..... Year(s) ..... Months |                                                     |                                 |                               |                               |                        |                     |               |
| <b>Education level:</b>                                                                               | (1)<br>No formal education                          | (2)<br>Primary                  | (3)<br>Secondary              | (4)<br>Universitary           | (5)<br>Other           |                     |               |
| <b>Social class:</b>                                                                                  | (1)<br>Low                                          | (2)<br>Lower middle             | (3)<br>Middle                 | (4)<br>Upper middle           | (5)<br>Upper           |                     |               |
| <b>Monthly household income:</b>                                                                      | (1)<br>Less than 700€                               | (2)<br>Between 700 and 1200€    | (3)<br>Between 1200 and 2200€ | (4)<br>Between 2200 and 3500€ | (5)<br>More than 3500€ |                     |               |
| <b>Live with:</b>                                                                                     | (1)<br>Partner and children                         | (2)<br>Partner without children | (3)<br>Parents/Siblings       | (4)<br>Friends                | (5)<br>Alone           | (6)<br>Other family | (7)<br>Others |
| <b>Write the number of persons that live in your household:</b> .....                                 |                                                     |                                 |                               |                               |                        |                     |               |
| <b>Write the name of the neighborhood in which you live (city, area)</b> .....                        |                                                     |                                 |                               |                               |                        |                     |               |
| <b>How long have you lived in your neighborhood (city, area)</b> .....Year(s).....Months              |                                                     |                                 |                               |                               |                        |                     |               |
| <b>Place where you live:</b>                                                                          | (1)<br>Privately owned home (with/without mortgage) |                                 |                               | (2)<br>Rented home            | (3)<br>Others          |                     |               |

- B. Now we are going to ask you some questions about the neighborhood where you live. We want to know the real opinions of the persons that live here. Please answer as honestly as possible:

**1= Completely disagree      10= Completely agree**

|                                                        |   |   |   |   |   |   |   |   |   |    |
|--------------------------------------------------------|---|---|---|---|---|---|---|---|---|----|
| 1. I like living in this neighborhood                  | 1 | 2 | 3 | 4 | 5 | 6 | 7 | 8 | 9 | 10 |
| 2. I would like to move to another neighborhood        | 1 | 2 | 3 | 4 | 5 | 6 | 7 | 8 | 9 | 10 |
| 3. When I spend time away, I look forward to returning | 1 | 2 | 3 | 4 | 5 | 6 | 7 | 8 | 9 | 10 |
| 4. When I am away, I miss my neighborhood              | 1 | 2 | 3 | 4 | 5 | 6 | 7 | 8 | 9 | 10 |
| 5. This is my favorite neighborhood to live in         | 1 | 2 | 3 | 4 | 5 | 6 | 7 | 8 | 9 | 10 |
| 6. When I am far away, I am happy to return            | 1 | 2 | 3 | 4 | 5 | 6 | 7 | 8 | 9 | 10 |
| 7. The neighborhood is part of my identity             | 1 | 2 | 3 | 4 | 5 | 6 | 7 | 8 | 9 | 10 |
| 8. I feel like I belong to the neighborhood            | 1 | 2 | 3 | 4 | 5 | 6 | 7 | 8 | 9 | 10 |
| 9. I feel like I am from this neighborhood             | 1 | 2 | 3 | 4 | 5 | 6 | 7 | 8 | 9 | 10 |

- C. Next, indicate how often you carry out each of the following actions:

|                                                                                                          | <b>1= Never</b> |   |   |   |   | <b>10= Always</b> |   |   |   |    |
|----------------------------------------------------------------------------------------------------------|-----------------|---|---|---|---|-------------------|---|---|---|----|
| 10. <u>Recycle</u> and use the recycling containers                                                      | 1               | 2 | 3 | 4 | 5 | 6                 | 7 | 8 | 9 | 10 |
| 11. Dispose of the garbage in the containers at the <u>established times</u>                             | 1               | 2 | 3 | 4 | 5 | 6                 | 7 | 8 | 9 | 10 |
| 12. Dispose of the garbage <u>outside</u> of the containers                                              | 1               | 2 | 3 | 4 | 5 | 6                 | 7 | 8 | 9 | 10 |
| 13. Use the wastebaskets                                                                                 | 1               | 2 | 3 | 4 | 5 | 6                 | 7 | 8 | 9 | 10 |
| 14. Damage and/or break the benches in the park/plaza                                                    | 1               | 2 | 3 | 4 | 5 | 6                 | 7 | 8 | 9 | 10 |
| 15. Damage the green spaces in the neighborhood                                                          | 1               | 2 | 3 | 4 | 5 | 6                 | 7 | 8 | 9 | 10 |
| 16. Paint graffiti in neighborhood streets                                                               | 1               | 2 | 3 | 4 | 5 | 6                 | 7 | 8 | 9 | 10 |
| 17. Pick up the excrement of dogs                                                                        | 1               | 2 | 3 | 4 | 5 | 6                 | 7 | 8 | 9 | 10 |
| 18. Leave the remains from drinks, drugs or sexual acts in the street (syringes, bottles, condoms, etc.) | 1               | 2 | 3 | 4 | 5 | 6                 | 7 | 8 | 9 | 10 |
| 19. Throw papers, cigarette butts or remains from food on the ground                                     | 1               | 2 | 3 | 4 | 5 | 6                 | 7 | 8 | 9 | 10 |
| 20. Show interest in and care for the neighborhood                                                       | 1               | 2 | 3 | 4 | 5 | 6                 | 7 | 8 | 9 | 10 |

D. Next, indicate how often your neighbors carry out each of the following actions:

|                                                                                                          | 1= Never |   |   |   |   | 10= Always |   |   |   |    |
|----------------------------------------------------------------------------------------------------------|----------|---|---|---|---|------------|---|---|---|----|
| 21. <u>Recycle</u> and use the recycling containers                                                      | 1        | 2 | 3 | 4 | 5 | 6          | 7 | 8 | 9 | 10 |
| 22. Dispose of the garbage in the containers at the <u>established times</u>                             | 1        | 2 | 3 | 4 | 5 | 6          | 7 | 8 | 9 | 10 |
| 23. Dispose of the garbage <u>outside</u> of the containers                                              | 1        | 2 | 3 | 4 | 5 | 6          | 7 | 8 | 9 | 10 |
| 24. Use the wastebaskets                                                                                 | 1        | 2 | 3 | 4 | 5 | 6          | 7 | 8 | 9 | 10 |
| 25. Damage and/or break the benches in the park/plaza                                                    | 1        | 2 | 3 | 4 | 5 | 6          | 7 | 8 | 9 | 10 |
| 26. Damage the green spaces in the neighborhood                                                          | 1        | 2 | 3 | 4 | 5 | 6          | 7 | 8 | 9 | 10 |
| 27. Paint graffiti in neighborhood streets                                                               | 1        | 2 | 3 | 4 | 5 | 6          | 7 | 8 | 9 | 10 |
| 28. Pick up the excrement of dogs                                                                        | 1        | 2 | 3 | 4 | 5 | 6          | 7 | 8 | 9 | 10 |
| 29. Leave the remains from drinks, drugs or sexual acts in the street (syringes, bottles, condoms, etc.) | 1        | 2 | 3 | 4 | 5 | 6          | 7 | 8 | 9 | 10 |
| 30. Throw papers, cigarette butts or remains from food on the ground                                     | 1        | 2 | 3 | 4 | 5 | 6          | 7 | 8 | 9 | 10 |
| 31. Show interest in and care for the neighborhood                                                       | 1        | 2 | 3 | 4 | 5 | 6          | 7 | 8 | 9 | 10 |

E. Next, what is your level of satisfaction regarding the place where you live:

|                                                                                    | 1= Completely dissatisfied |   |   |   |   | 10= Very satisfied |   |   |   |    |
|------------------------------------------------------------------------------------|----------------------------|---|---|---|---|--------------------|---|---|---|----|
| 32. In general, how satisfied are you with your neighborhood?                      | 1                          | 2 | 3 | 4 | 5 | 6                  | 7 | 8 | 9 | 10 |
| 33. To what extent are you satisfied with your home?                               | 1                          | 2 | 3 | 4 | 5 | 6                  | 7 | 8 | 9 | 10 |
| 34. Regarding the neighbors in your neighborhood, how satisfied are you with them? | 1                          | 2 | 3 | 4 | 5 | 6                  | 7 | 8 | 9 | 10 |

F. Would you support the following measures to your neighborhood?:

|                                                                            | 1= Not at all |   |   |   |   | 10= Yes, definitely |   |   |   |    |
|----------------------------------------------------------------------------|---------------|---|---|---|---|---------------------|---|---|---|----|
| 35. Impose fines for littering on the streets (papers, shells, etc.)       | 1             | 2 | 3 | 4 | 5 | 6                   | 7 | 8 | 9 | 10 |
| 36. Pay more taxes to improve cleaning and maintenance of the neighborhood | 1             | 2 | 3 | 4 | 5 | 6                   | 7 | 8 | 9 | 10 |
| 37. Implementation of campaigns to increase awareness                      | 1             | 2 | 3 | 4 | 5 | 6                   | 7 | 8 | 9 | 10 |
| 38. Establishment of educational programs in the schools                   | 1             | 2 | 3 | 4 | 5 | 6                   | 7 | 8 | 9 | 10 |
